# Supplementary material for: Tunable Viscoelastic Properties of Sodium Polyacrylate Solution via CO2-Responsive Switchable Water
Source: Molecules. 2021 Jun 24;26(13):3840. doi: 10.3390/molecules26133840 (PMC8270326; doi:10.3390/molecules26133840)
Supplement: Supplementary file 1 [file molecules-26-03840-s001.zip › molecules-1260550-supplementary.pdf]

## Supporting Information for

# Tunable Viscoelastic Properties of Sodium Polyacrylate Solution via CO<sub>2</sub>-Responsive Switchable Water

Dianguo Wu <sup>1,2</sup>, Yiwen Shi <sup>3</sup>, Kun Lv <sup>2</sup>, Bing Wei <sup>1</sup>, Youyi Zhu <sup>4</sup>, Hongyao Yin <sup>2,\*</sup>, Yujun Feng <sup>2,\*</sup>

<sup>1</sup> State Key Laboratory of Oil and Gas Reservoir Geology and Exploitation, Southwest Petroleum University, Chengdu 610500, People's Republic of China; wu-dianguo@foxmail.com (D.W.), bwei@swpu.edu.cn (B.W.)

<sup>2</sup> Polymer Research Institute, Sichuan University, Chengdu 610065, People's Republic of China; lyukun@stu.scu.edu.cn (K.L.)

<sup>3</sup> Sichuan University-Pittsburgh Institute, Sichuan University, Chengdu 610065, People's Republic of China; sywvivi@hotmail.com (Y.S.)

<sup>4</sup> Research Institute of Petroleum Exploration and Development, CNPC, Beijing 10083, People's Republic of China; zhyy@petrochina.com.cn (Y.Z.)

\* Correspondence: hyyin@scu.edu.cn (H. Yin); yjfeng@scu.edu.cn (Y. Feng)

## S1. Viscosity-shear rate curves of NaPAA aqueous solution

The flow curves of NaPAA solution with different concentrations in deionized water are displayed in Figure S1. The shear viscosity increases with the increment of NaPAA concentrations. In addition, the NaPAA aqueous solutions show a Newtonian region initially, followed by a shear thinning behavior, which can be attributed to the increase in the alignment of the polymer molecules in the flow direction by shearing [1,2].

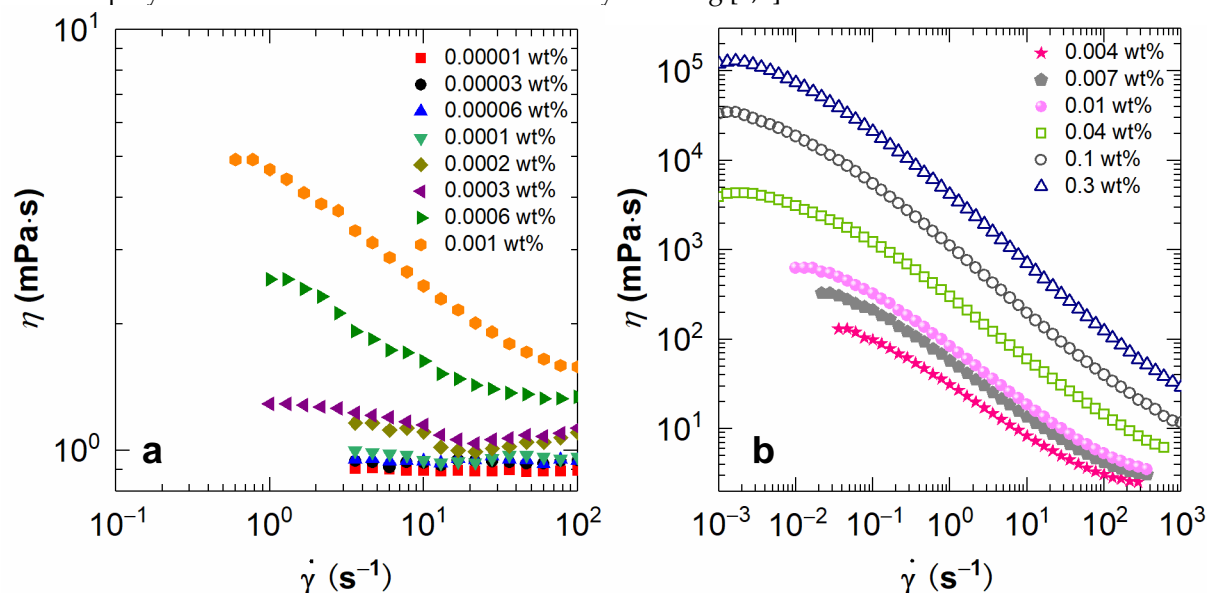

**Figure S1** Viscosity as a function of shear rate for NaPAA aqueous solution at (a) low concentrations and (b) high concentrations at 25 °C.

## S2: Viscosity-shear rate curves of 0.65 wt% and 1.30 wt% NaPAA aqueous solution at different conditions

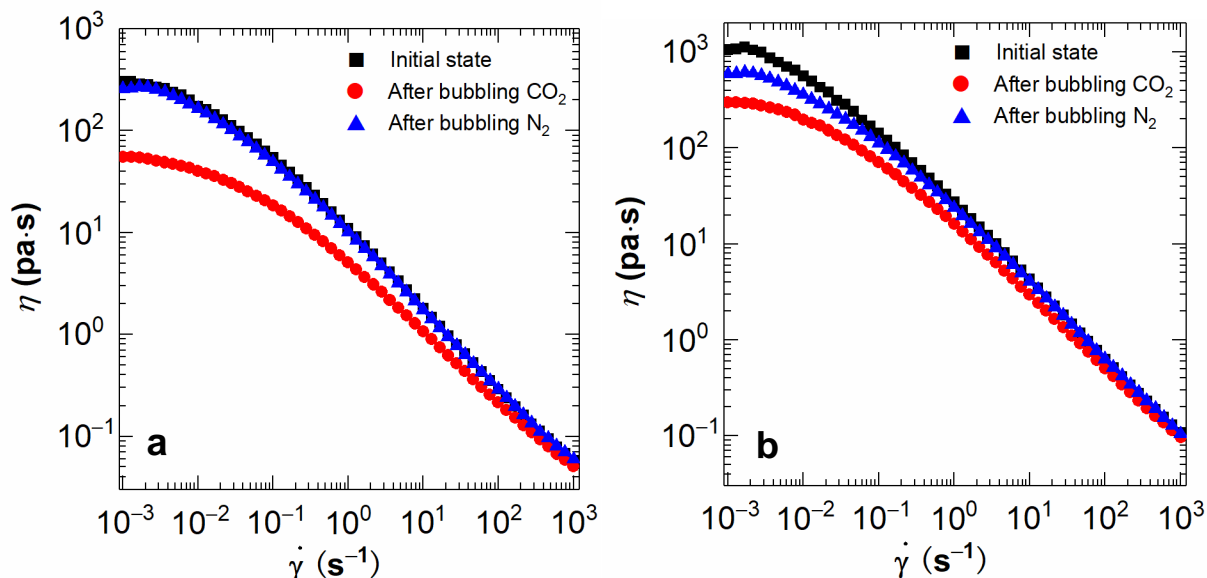

**Figure S2** Viscosity-shear rate curves of the initial (a) 0.65 wt% and (b) 1.30 wt% NaPAA solution, and after bubbling CO<sub>2</sub> and then N<sub>2</sub> at 25 °C.

## S3: Strain sweep measurement of 0.65 wt% and 1.30 wt% NaPAA aqueous solutions

To confirm the linear viscoelastic region of 0.65 and 1.30 wt% NaPAA aqueous solution at 25 °C, we conducted the stress sweep test of the two samples (Figure S3). Generally, the ultimate value of viscoelastic region, i.e. linearity limit ( $\gamma_L$ ), is defined as the stress value when  $G'$  deviates from its stable value by 5% (ISO 6721-10 and ED/DIN EN 14770). It can be found that the  $\gamma_L$  of 0.65 wt% and 1.30 wt% NaPAA aqueous solution is all situated at 40 %. In other words, only when  $\gamma < 40\%$ , can the fluids keep a stable structure.

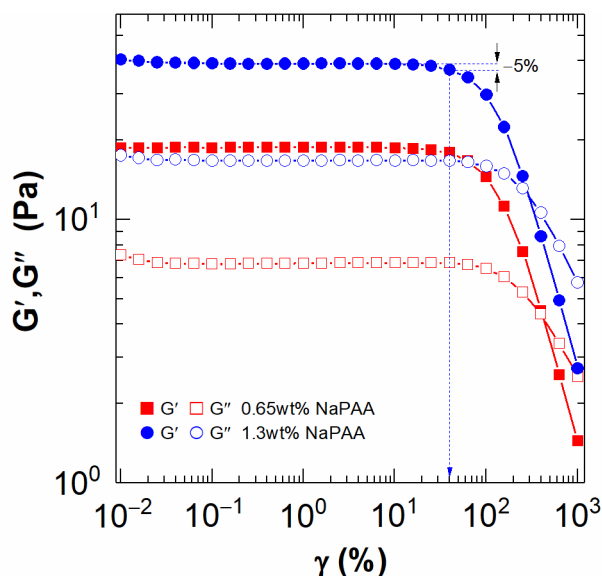

**Figure S3** Strain sweep curves of 0.65 wt% and 1.30 wt% NaPAA aqueous solution at 25 °C,  $\omega = 10 \text{ rad}\cdot\text{s}^{-1}$ .

S4: Viscosity-shear rate curves of 0.65 wt% NaPAA solution with DMEA at different conditions

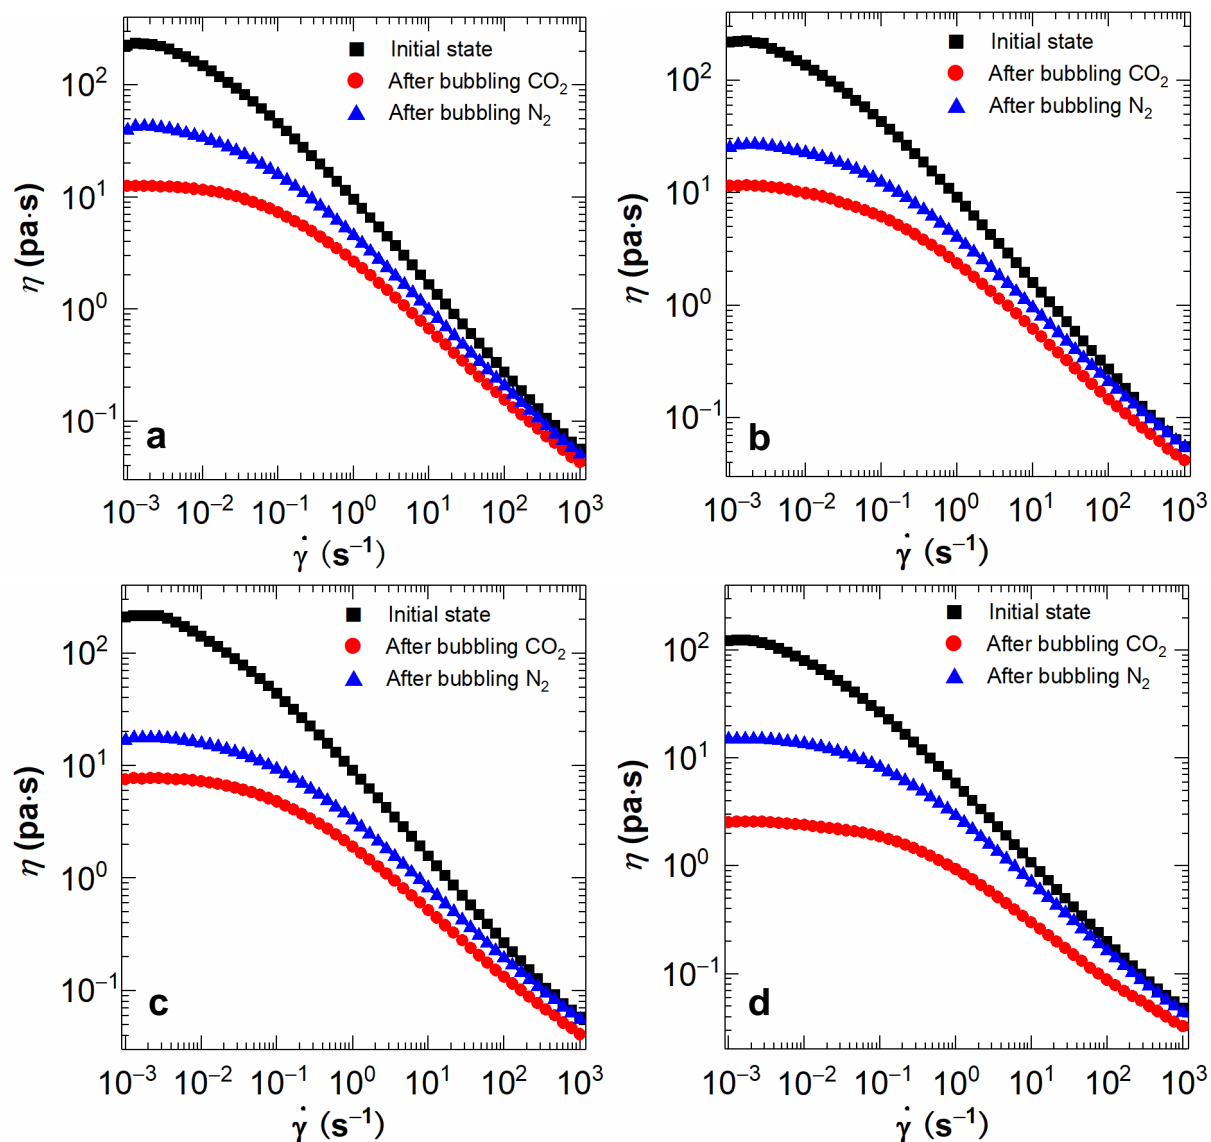

**Figure S4** Viscosity-shear rate curves of 0.65 wt% NaPAA solution with (a) 0.6 wt%, (b) 1.2 wt%, (c) 2.4 wt% and (d) 4.8 wt% DMEA at 25 °C.

**S5: Viscosity-shear rate curves of 1.30 wt% NaPAA solution with DMEA at different conditions**

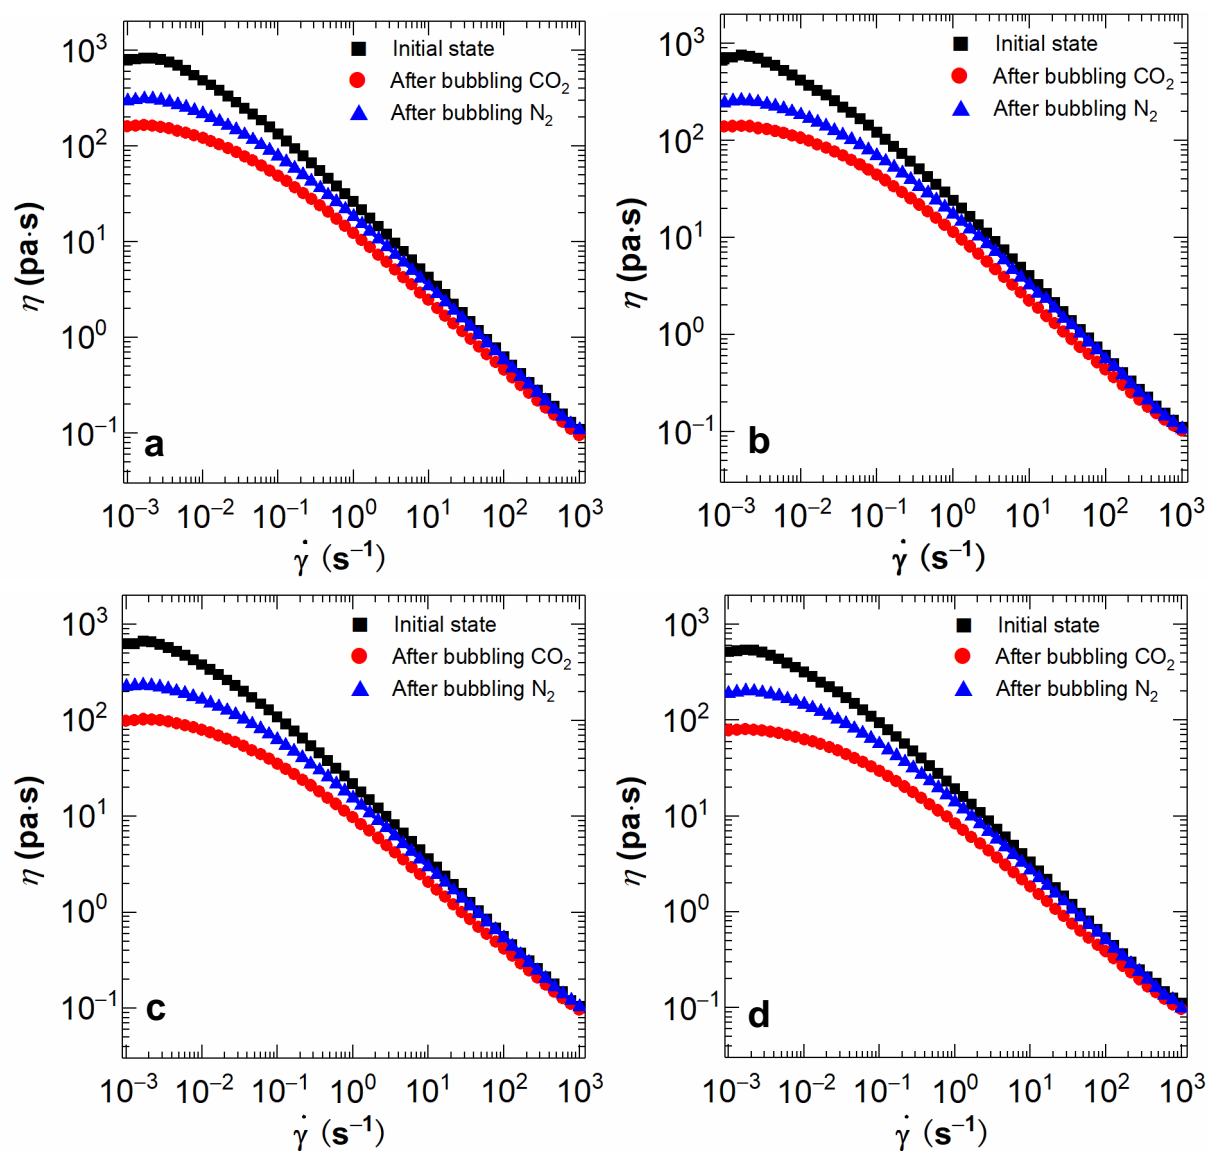

**Figure S5** Viscosity-shear rate curves of 1.30 wt% NaPAA solution with (a) 1.2 wt%, (b) 2.4 wt%, (c) 4.8 wt% and (d) 9.6 wt% DMEA at 25 °C.

## S6: Loss and recovery ratio of $\eta_0$

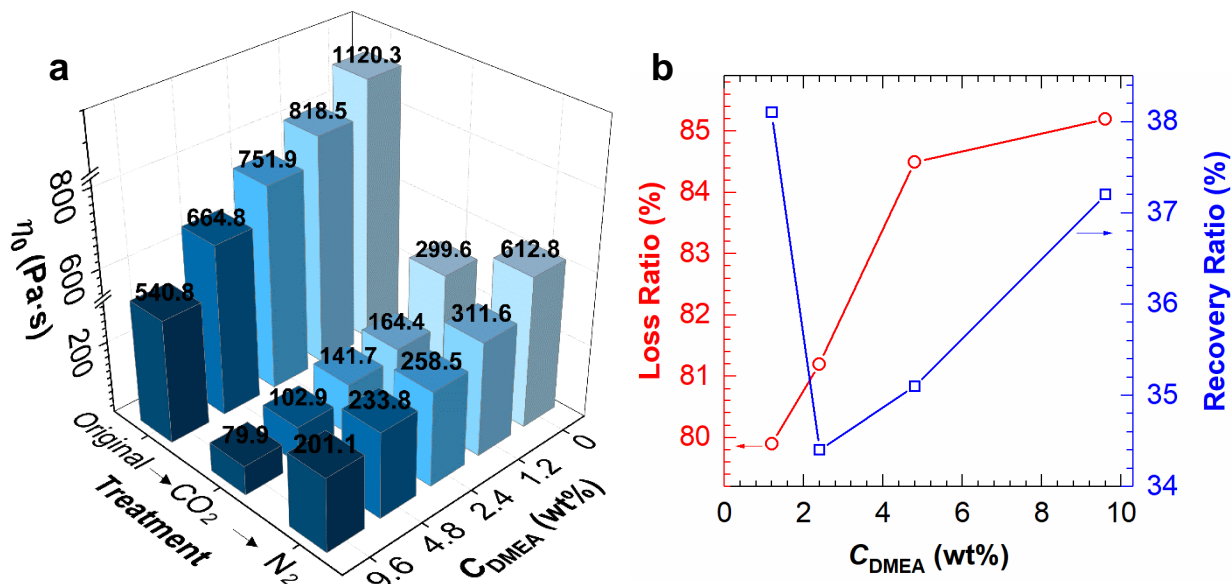

**Figure S6.** (a)  $\eta_0$  of the initial 1.30 wt% NaPAA solution with different DMEA concentration, and after bubbling  $\text{CO}_2$  and then  $\text{N}_2$  at 25 °C. (b) The loss ratio of  $\eta_0$  of the solution after  $\text{CO}_2$  treatment and the recovery ratio of  $\eta_0$  of the solution after  $\text{N}_2$  treatment.

As shown in **Figure S6a**, the initial  $\eta_0$  of the 1.30 wt% NaPAA aqueous solutions was 1120.3 Pa·s<sup>-1</sup>, then it dropped to 299.6 Pa·s<sup>-1</sup> when bubbling  $\text{CO}_2$ ; after introducing  $\text{N}_2$  to remove  $\text{CO}_2$ , the  $\eta_0$  recovered to 612.8 Pa·s<sup>-1</sup>. Adding DMEA into the 1.30 wt% NaPAA aqueous solutions, the initial  $\eta_0$  of the mixture decreased from 818.5 Pa·s<sup>-1</sup> to 540.8 Pa·s<sup>-1</sup> with the concentration of DMEA increased from 1.2 wt% to 9.6 wt%. In the presence of  $\text{CO}_2$ , the ammonium bicarbonate salts, *i.e.*,  $\text{DMEA}^+\text{H}^+$ , largely reduced the  $\eta_0$  of the mixture. Specifically, its  $\eta_0$  decreased from 164.4 Pa·s<sup>-1</sup> to 79.9 Pa·s<sup>-1</sup> (Figure S6a), and its loss ratio increased from 79.9 % to 85.2 % (Figure S6b). It can be found that the reduced degree in loss ratio of 1.30 wt% NaPAA/DMEA solution is lower than that of 0.65 wt% NaPAA/DMEA solution, which may be interpreted as the van der Waals force between molecular chains in 1.30 wt% NaPAA solution is stronger than that of 0.65 wt% solution, which can partially offset the viscosity loss induced by protonated DMEA. After treated with  $\text{N}_2$ , the  $\eta_0$  of 1.30 wt% NaPAA/DMEA solution again recovered to close to its initial value (Figure S6a), and its loss ratio varied from 34.4 % to 38.1 % (Figure S6b).

**S7: Frequency sweep curves of 1.30 wt% NaPAA aqueous solution with different  $C_{\text{DMEA}}$**

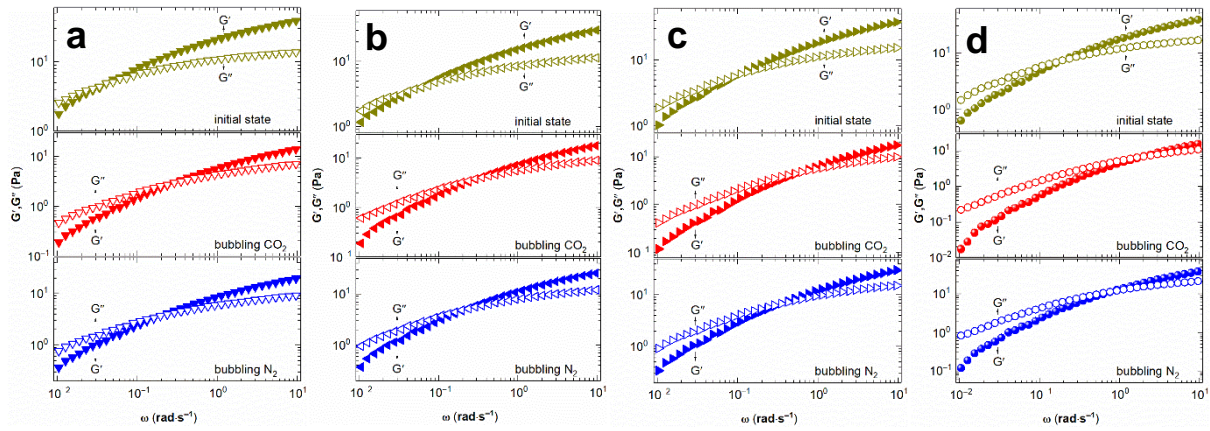

**Figure S7.** Frequency sweep curves of 1.30 wt% NaPAA aqueous solution containing (a) 1.2 wt%, (b) 2.4 wt%, (c) 4.8 wt%, and (d) 9.6 wt% DMEA in the presence or absence of  $\text{CO}_2$ ,  $\gamma = 10\%$ ,  $T = 25^\circ\text{C}$ .

**S8: pH variation of 0.65 wt% and 1.30 wt% NaPAA aqueous solutions with different DMEA concentrations**

**Table S1** pH of 0.65 wt% NaPAA solution with different DMEA concentrations at different conditions

| $C_{\text{DMEA}}$ (wt%) | Initial          | Bubbling $\text{CO}_2$ | Bubbling $\text{N}_2$ |
|-------------------------|------------------|------------------------|-----------------------|
| 0                       | $9.17 \pm 0.02$  | $5.82 \pm 0.03$        | $7.99 \pm 0.02$       |
| 0.6                     | $11.14 \pm 0.03$ | $6.75 \pm 0.04$        | $8.94 \pm 0.02$       |
| 1.2                     | $11.26 \pm 0.01$ | $6.95 \pm 0.03$        | $8.93 \pm 0.04$       |
| 2.4                     | $11.43 \pm 0.02$ | $7.25 \pm 0.03$        | $8.94 \pm 0.04$       |
| 4.8                     | $11.57 \pm 0.05$ | $8.08 \pm 0.02$        | $9.21 \pm 0.02$       |

**Table S2** pH of 1.30 wt% NaPAA solution with different DMEA concentrations at different conditions

| $C_{\text{DMEA}}$ (wt%) | Initial          | Bubbling $\text{CO}_2$ | Bubbling $\text{N}_2$ |
|-------------------------|------------------|------------------------|-----------------------|
| 0                       | $9.47 \pm 0.04$  | $6.31 \pm 0.05$        | $7.47 \pm 0.12$       |
| 1.2                     | $11.36 \pm 0.01$ | $6.83 \pm 0.04$        | $8.18 \pm 0.04$       |
| 2.4                     | $11.62 \pm 0.05$ | $7.14 \pm 0.04$        | $8.92 \pm 0.02$       |
| 4.8                     | $11.83 \pm 0.03$ | $7.99 \pm 0.01$        | $9.17 \pm 0.05$       |
| 9.6                     | $11.88 \pm 0.02$ | $8.14 \pm 0.03$        | $9.38 \pm 0.02$       |

---

**S9: Conductivity variation of 0.65 wt% and 1.30 wt% NaPAA aqueous solutions with different DMEA concentrations****Table S3** Conductivity of 0.65 wt% NaPAA solution with different DMEA concentrations at different conditions

| $C_{\text{DMEA}}$ (wt%) | Initial         | Bubbling $\text{CO}_2$ | Bubbling $\text{N}_2$ |
|-------------------------|-----------------|------------------------|-----------------------|
| 0                       | $2.06 \pm 0.03$ | $3.53 \pm 0.01$        | $2.54 \pm 0.02$       |
| 0.6                     | $2.21 \pm 0.02$ | $7.39 \pm 0.01$        | $5.12 \pm 0.01$       |
| 1.2                     | $2.36 \pm 0.04$ | $10.88 \pm 0.02$       | $6.42 \pm 0.10$       |
| 2.4                     | $2.44 \pm 0.03$ | $17.31 \pm 0.01$       | $9.54 \pm 0.05$       |
| 4.8                     | $2.47 \pm 0.05$ | $23.46 \pm 0.12$       | $12.86 \pm 0.11$      |

**Table S4** Conductivity of 1.30 wt% NaPAA solution with different DMEA concentrations at different conditions

| $C_{\text{DMEA}}$ (wt%) | Initial         | Bubbling $\text{CO}_2$ | Bubbling $\text{N}_2$ |
|-------------------------|-----------------|------------------------|-----------------------|
| 0                       | $3.86 \pm 0.04$ | $5.56 \pm 0.02$        | $4.32 \pm 0.12$       |
| 1.2                     | $3.92 \pm 0.03$ | $11.24 \pm 0.01$       | $7.33 \pm 0.04$       |
| 2.4                     | $4.05 \pm 0.06$ | $15.17 \pm 0.02$       | $8.77 \pm 0.07$       |
| 4.8                     | $4.23 \pm 0.05$ | $22.33 \pm 0.03$       | $13.76 \pm 0.21$      |
| 9.6                     | $4.92 \pm 0.07$ | $31.28 \pm 0.16$       | $15.56 \pm 0.13$      |

**References**

1. Castillo-Tejas J, Castrejón-González O, Carro S, González-Coronel V, Alvarado J, Manero O. Associative polymers. part III: shear rheology from molecular dynamics. *Colloid Surface., A.* **2016**, 491, 37–49.
2. Zhu R, Feng Y, Luo P. Net Contribution of hydrophobic association to the thickening power of hydrophobically modified polyelectrolytes prepared by micellar polymerization. *Macromolecules.* **2020**, 53, 1326–1337.
